# Supplementary material for: Development and Characterization of Indole-Responsive Whole-Cell Biosensor Based on the Inducible Gene Expression System from Pseudomonas putida KT2440
Source: MDPI journal article supplement (doi:10.3390/ijms23094649), 2022-04-22
Supplement: s1 [file s1]

## Supplementary Materials

Development and characterization of indole-responsive whole-cell biosensor based on the inducible gene expression system from *Pseudomonas putida* KT2440

Paulius Matulis <sup>1</sup>, Ingrida Kutraite <sup>1</sup>, Ernesta Augustiniene <sup>1</sup>, Egle Valanciene <sup>1</sup>, Ilona Jonuskiene <sup>1</sup> and Naglis Malys <sup>1,2,\*</sup>

<sup>1</sup> Bioprocess Research Centre, Faculty of Chemical Technology, Kaunas University of Technology, Radvilėnų pl. 19, Kaunas LT-50254, Lithuania

<sup>2</sup> Department of Organic Chemistry, Faculty of Chemical Technology, Kaunas University of Technology, Radvilėnų pl. 19, Kaunas LT-50254, Lithuania

\*Corresponding author, email: naglis.malys@ktu.lt

## Supplementary Tables

**Supplementary Table S1.** Bacterial strains used in the study.

| Strain                         | Characteristics                                                                                                                                                                                                                                                   | Reference or source                           |
|--------------------------------|-------------------------------------------------------------------------------------------------------------------------------------------------------------------------------------------------------------------------------------------------------------------|-----------------------------------------------|
| <i>Escherichia coli</i> TOP10  | F <sup>-</sup> <i>mcrA</i> $\Delta$ ( <i>mrr-hsdRMS-mcrBC</i> )<br>$\Phi$ 80 <i>lacZ</i> $\Delta$ M15 $\Delta$ <i>lacX74</i> <i>recA1</i><br><i>araD139</i> $\Delta$ ( <i>araleu</i> )7697 <i>galU</i><br><i>galK</i> <i>rpsL</i> (StrR) <i>endA1</i> <i>nupG</i> | Thermo Fisher Scientific,<br>Waltham, MA, USA |
| <i>Cupriavidus necator</i> H16 | Wild-type strain                                                                                                                                                                                                                                                  | DSM 428 (DSMZ,<br>Braunschweig, Germany)      |

**Supplementary Table S2.** Oligonucleotide primers used in the study.

| Name     | Oligonucleotide primer sequence (5' → 3')                                       |
|----------|---------------------------------------------------------------------------------|
| P015     | gggccttgcgtttatgacgtctgatatgcaagcgaactaagcgctctgc                               |
| P016     | cgtcttcgctactcgccatatgggcgctccaaggcgtag                                         |
| P015TgSr | gggccttgcgtttatgacgtcttacctgtgagttttctgacaagtttac                               |
| P065     | tcactccaccggtgcttaagcaaaagatcttttaagaaggagatatacatatggaaaactttaacatctccctgaaccg |
| P066     | tccttactcgagtttggatccttaaaactctttaagtttgcggtgaagtgc                             |

Restriction endonuclease recognition sites are underlined.

## Supplementary Figures

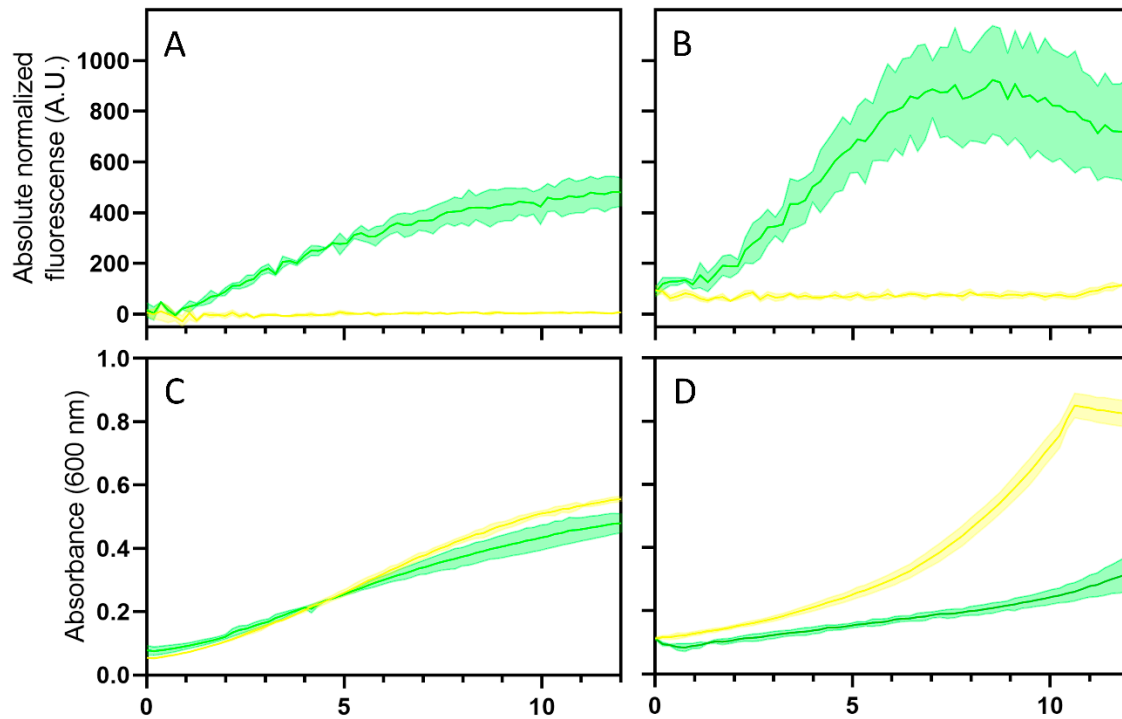

**Supplementary Figure S1.** Induction dynamics of *PpTrpI/P<sub>PP\_RS00425</sub>*-based *E. coli* and *C. necator* biosensors. Absolute normalized fluorescence (A, B) and absorbance (C, D) obtained using *E. coli* (A, C) and *C. necator* (B, D) harbouring inducible system *PpTrpI/P<sub>PP\_RS00425</sub>* (pPM0081). Measurements were performed over the period of 12 hours in MM supplemented with 1 mM (green) and without indole (yellow). Data are mean  $\pm$  SD,  $n = 3$ .

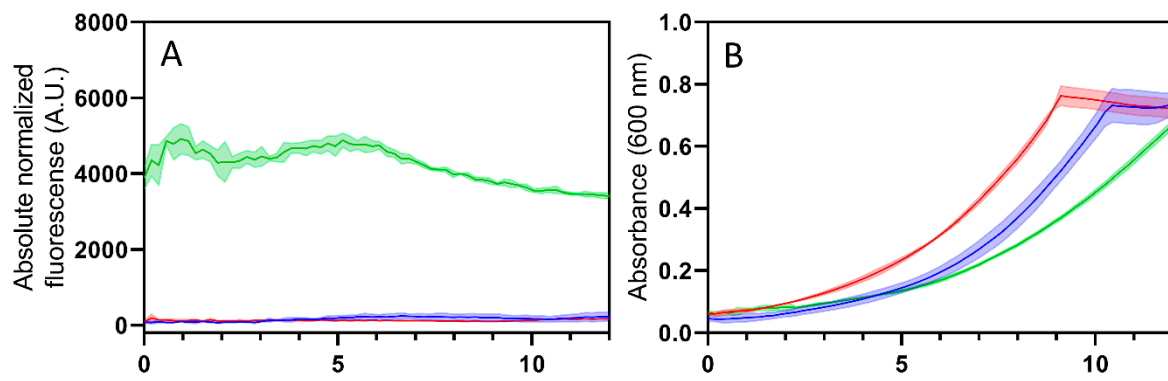

**Supplementary Figure S2.** Screening and characterization of *tnaA*-positive strains using *C. necator*/PpTrpI/P<sub>PP\_RS00425</sub> biosensor. Absolute normalized fluorescence (A) and absorbance (B) of *C. necator* harbouring inducible system PpTrpI/P<sub>PP\_RS00425</sub> without (pPM0081; control, blue) or with *tnaA* gene (pPM0083; red and green). Data are mean  $\pm$ SD, n=3.

## A

AatII

**gacgtc**tgatatgcaagcgaa**acta**agcgctctgccgcgaagtccgcccctaaccactgcgccaactgctcggcgcgcccgtctcggcgcgcgctggcaccacaatgc  
end of *trpI* (PP\_RS00425)

cagcgccgcctgggtaggtgaaaagccccaaaggcgcaactcaatcgccccccgaggtcatcggcgaccagcggtcggtgctatcgccacgcccacatcgggccacg  
gcagcctccagcaggtatatacaggtgctcgaaggcctggccatagtgaaatgccgcggctccaggccctgttcaccacccaggtcgccaggtctgtggcggtgacgt  
ggtgtgcagcaaggcttcgccagcagtgcttggcgggcgcgccctgcaagcgctggaaacctgcgaaatgcgggctgagcaccggcccgatgcattctcgccagca  
catgcacctgcatgtccgctggccacggtggctcgccatacaccagcaacgcacatccagccggcgccgcgggtcaaggtcgccctacccgccgacaggtgcaagcgc  
agctcaggcaaatccgctgcaaccgccccagccgcggaataaaccacgcgcagcaggtgcccagcagccagcacgaatggcgctcgctcacatcacggctga  
gctcggaacacacgctgcgcagccggtcgaaggcctcaccgctggcatcgcgagacgcataccggcatctgtgagttgatgccagcccgtccttgacgaacagggtga  
cgcccagatgctcctcaagcaccttgatctgccggctgacagcgccgtgggtgacgtgcagcgcttcgcgcgctggctgacactgttcagcctggctgtagcctcgaaggc  
gcgcagggcattgaggggagggaggtcgtgggc**cat**tt**ac**ctgtgagttt**ctgacaagtttacgcaatcttatcggttttcagccgagcttgccgtggttagagtaaagcc**

start of *trpI*

NdeI

**catcactcattcactacgccttgagcgcc**catatg****

start of *rfp*

## B

AatII

**gacgtc**tt**ac**ctgtgagttt**ctgacaagtttacgcaatcttatcggttttcagccgagcttgccgtggttagagtaaagcccatcactcattcactacgccttgagcgcc**

NdeI

**catatg**

start of *rfp*

## C

BglII

**agatc**tttaagaaggagatatacat**atg**gaaaaactttaacatctccctgaaccgttcgcattcgtgtattgagccagtaaaacgtaccactcgcgcttatcgtgaagaggc  
start of *tnaA*

aattattaaatccggtatgaaccggttctgctggatagcgaagatgttttatcgatttactgaccgacagcggcaccggggcggtgacgcagagcatgcaggctgcgatga  
tgcgcggcgacgaagcctacagcggcagtcgtagctactatgcgttagccgagtcagtgaaaaatatcttgggtatcaatacaccattccgactaccaggggcgtggcgca  
gagcaaatctatatccggtactgattaaaaaacgcgagcaggaaaaaggcctggatcgacgcaaaatggtggcgttctctaactatttcttgataccacgcagggccatag  
ccagatcaacggctgtaccgtgcgtaacgtctatatcaaagaagccttcgatacggcggtgcgtttacgactttaaaggcaactttgaccttgagggttagaacgcggtattg  
aagaagttggtccgaataacgtgccgtatatcgttgcaaccatcaccagtaactctgcaggtggtcagccggttactggcaacttaaaagcagatgtacagcatcgcaag  
aaatacgatattccggtggtaatggactccgcgcgcttctgctgaaaacgcctatttcatcaagcagcgtgaagcagaatacaaaagactggaccatcgagcagatcaccgcg  
aaactacaaatatgccgatgtcggcagatgccgcaagaagatgcgatgggtccgatggcgccgtcgtgtgcatgaaagacgacagcttcttgatgtgtacaccga  
gtgcagaaccctttgcgtggtgcaggaaggcttccgcacatatggcggcctggaaggcggcgcgatggagcgtctggcggtaggctgtgatgacggcatgaatctcgact  
ggctggcttatcgtatcgcgaggtacagtatctggtcgtggtctggaagagattggcggttctgctgcagcagggcgggcggtcacgcggcattcgttgatgcccgtaaact  
gttgcgcataatccggcagaccagttcccggcacaggcgctggcctgcgagctgtataaagtcgcgggtatccgtgcggtgaaattggctcttctgttaggcgcgcatc  
cgaaaaccggtaaacactgccatgccggctgaactgctgcgtttaaccattccgcgcgaacataactcaaacacatatggacttcatttgaagcctttaacatgtgaa

BamHI

agagaacgcggcgcaatattaaaggattaacctttacgtacgaaccgaaagtattgctgctacttcaccgcaaaacttaagaagtt**taaggatcc**

end of *tnaA*

**Supplementary Figure S3.** Nucleotide sequences of genetic elements of the indole-inducible system. (A) Nucleotide sequence containing *trpI* gene, encoding LysR family transcriptional regulator (locus tag *PP\_RS00430*), and intergenic region *PP\_RS00430/PP\_RS00425*, assembled in pPM0081 and corresponding to the schematic representation in Figure 1B. (B) Sequence of intergenic region *PP\_RS00430/PP\_RS00425* (in pPM0082 and Figure 1C). (C) Nucleotide sequence of *tnaA* gene encoding tryptophanase (in pPM0083 and Figure 1D). The start and end of open reading frames are displayed in bold. AatII, NdeI, BglII, and BamHI restriction sites are underlined. The nucleotides of intergenic region *PP\_RS00430/PP\_RS00425* are highlighted in green.
